# Supplementary material for: Spiculisporic Acids B–D, Three New γ-Butenolide Derivatives from a Sea Urchin-Derived Fungus Aspergillus sp. HDf2
Source: MDPI journal article supplement (doi:10.3390/molecules171113175), 2012-11-05

# Supporting Information

## NMR spectra of compounds 1–3

**Figure S1.** The  $^1\text{H}$ -NMR spectrum of compound **1** (methanol- $d_4$ , 500 MHz).

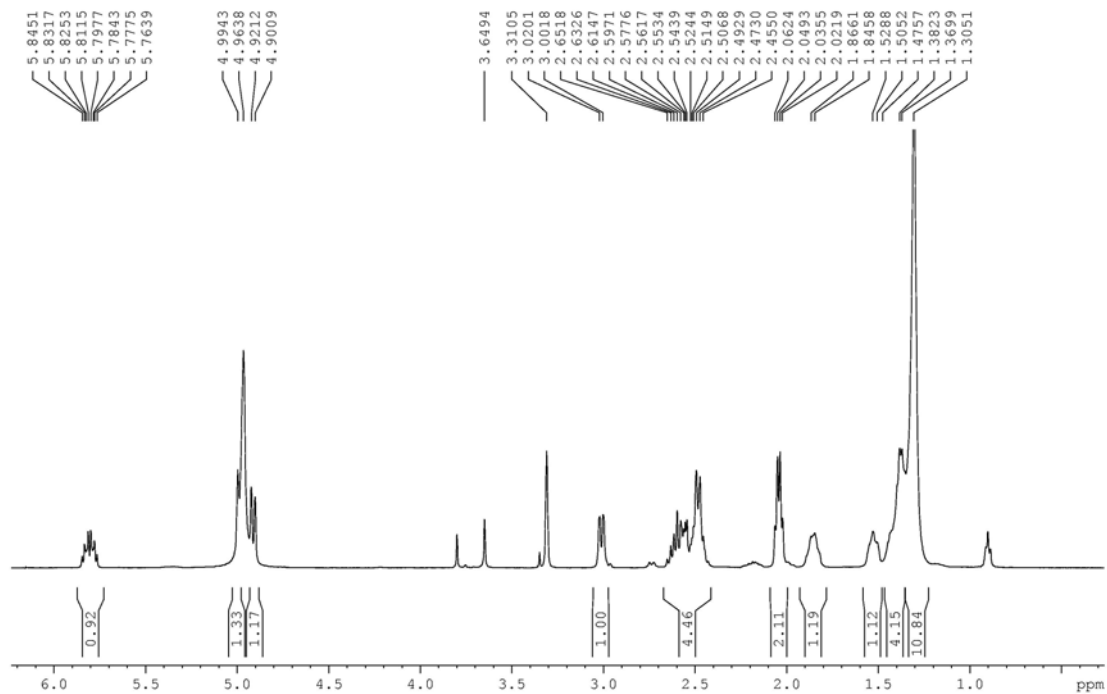

**Figure S2.** The  $^{13}\text{C}$ -NMR spectrum of compound **1** (methanol- $d_4$ , 125 MHz).

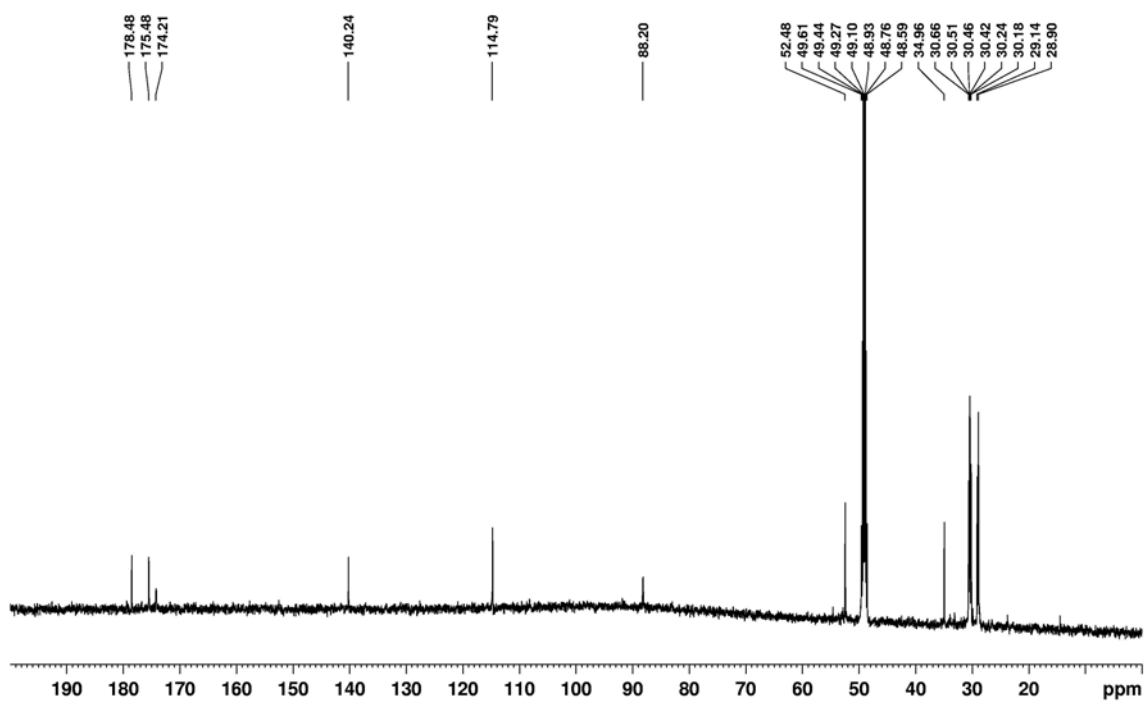

**Figure S3.** The DEPT135 NMR spectrum of compound **1** (methanol-*d*<sub>4</sub>, 125 MHz).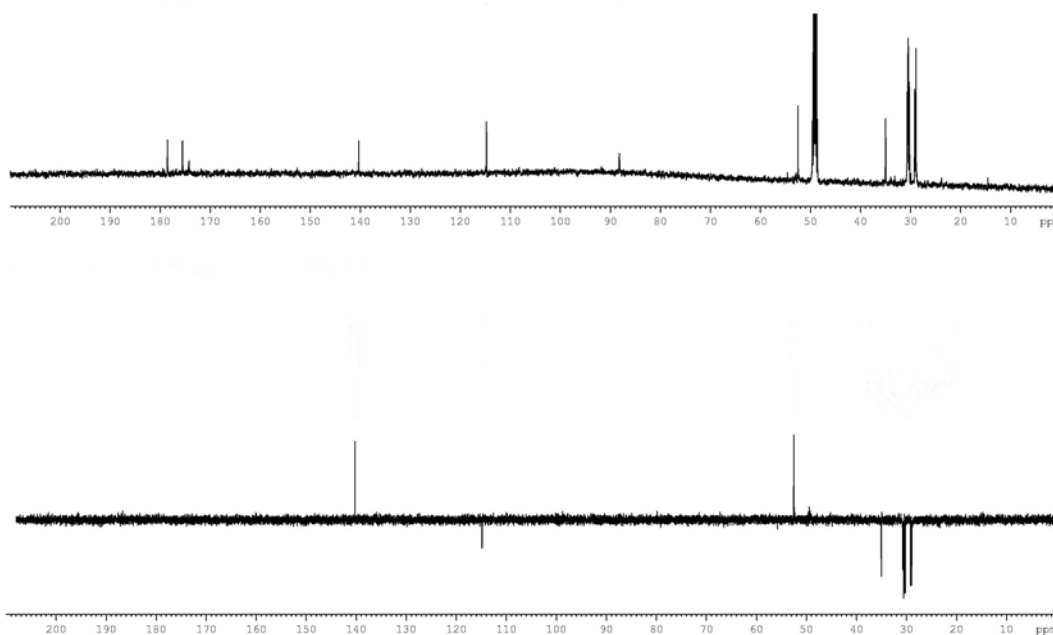**Figure S4** The HRESIMS spectrum of compound **1**.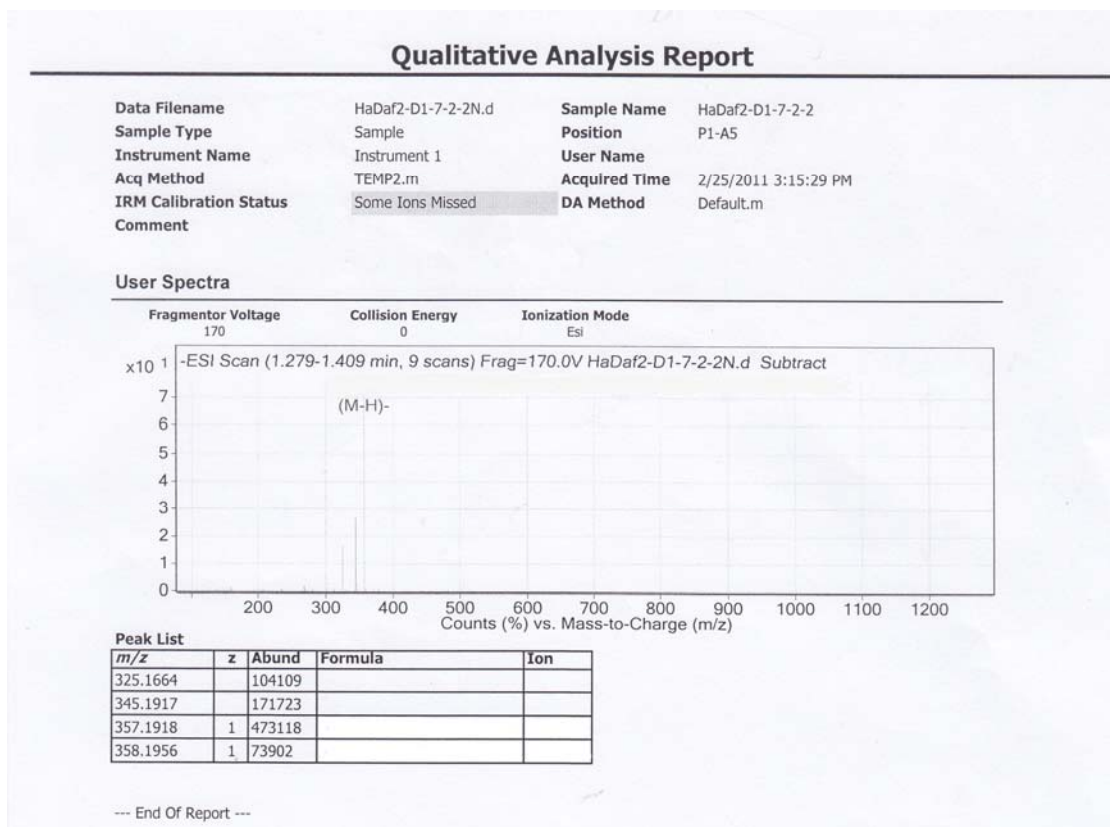

Figure S5. The  $^1\text{H}$ -NMR spectrum of compound 2 (methanol- $d_4$ , 500 MHz).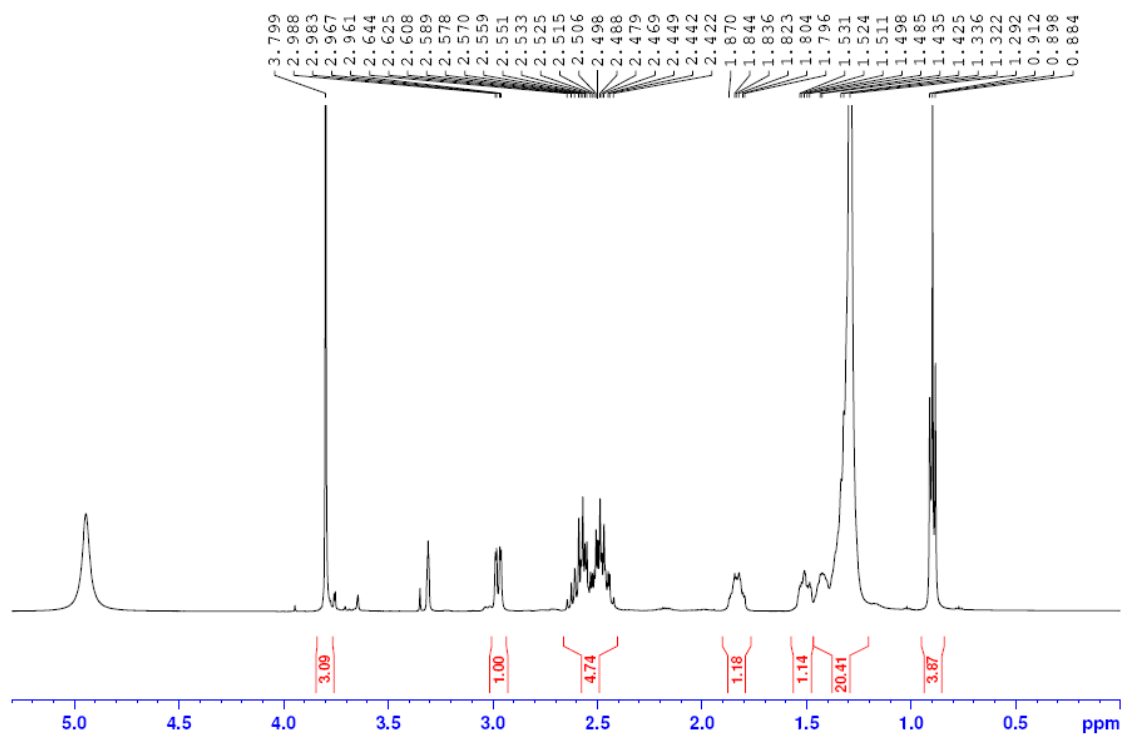Figure S6. The  $^{13}\text{C}$ -NMR spectrum of compound 2 (methanol- $d_4$ , 125 MHz).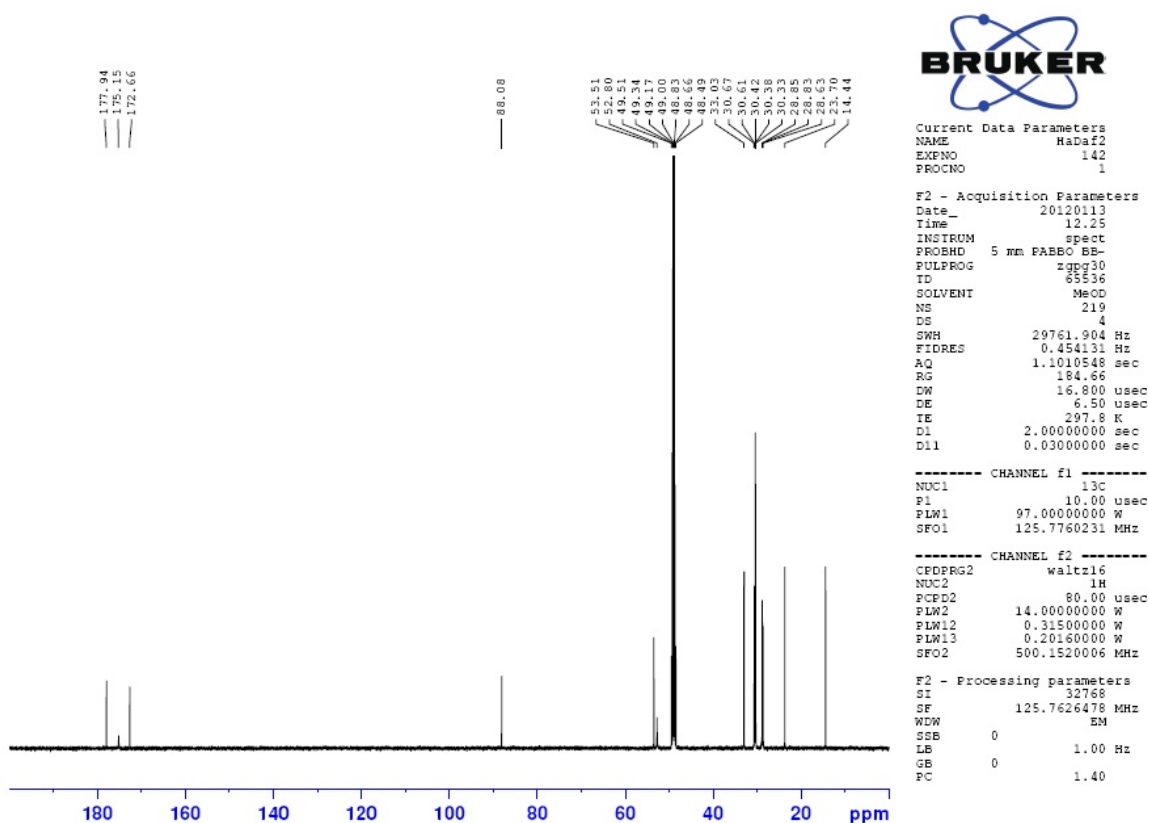

Figure S7. The DEPT135 NMR spectrum of compound 2 (methanol- $d_4$ , 125 MHz).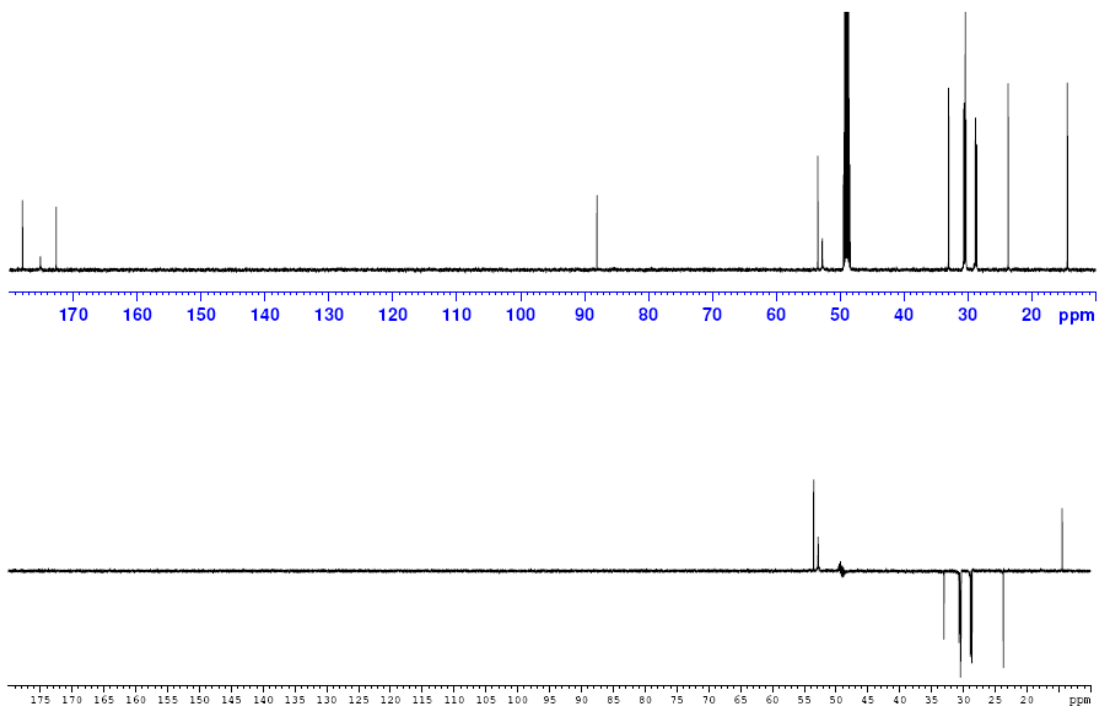

Figure S8. The HRESIMS spectrum of compound 2.

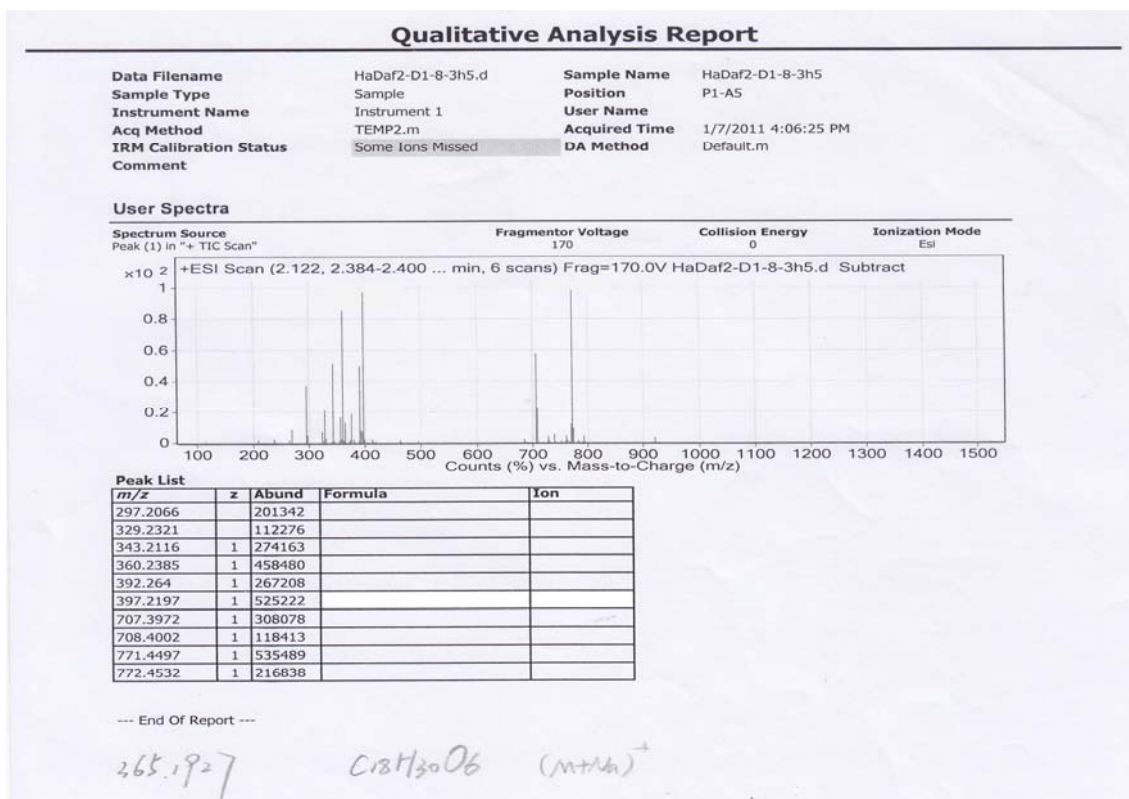

Figure S9. The  $^1\text{H}$ -NMR spectrum of compound **3** (methanol- $d_4$ , 500 MHz).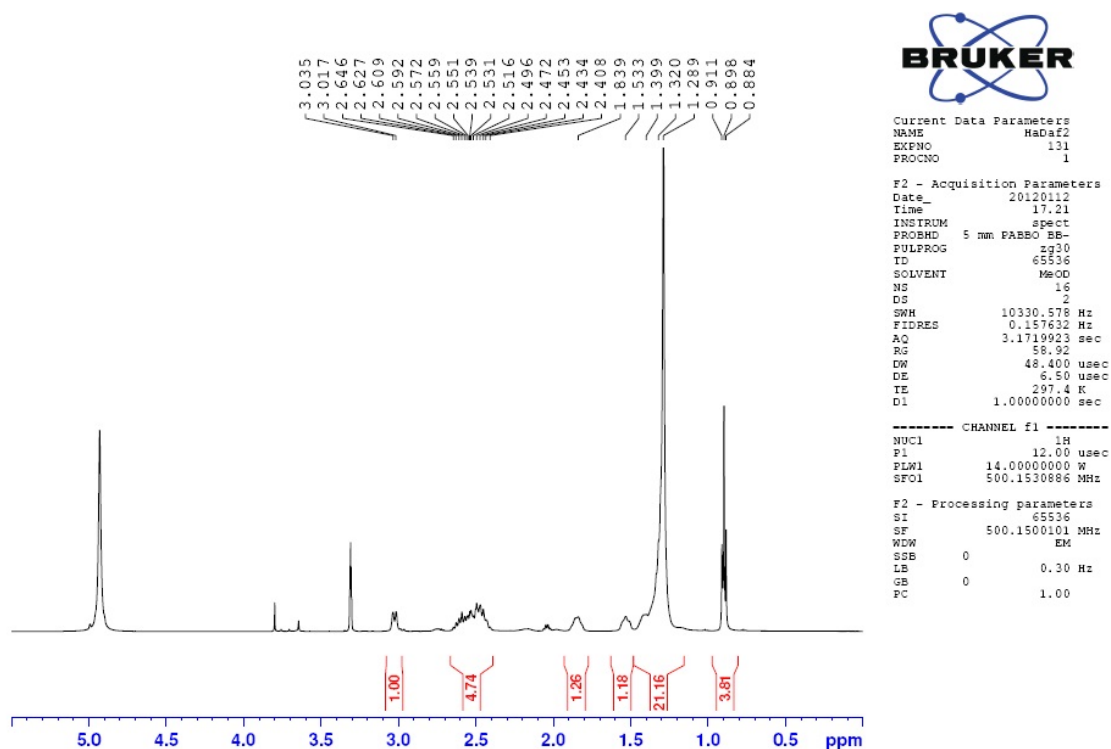Figure S10. The  $^{13}\text{C}$ -NMR spectrum of compound **3** (methanol- $d_4$ , 125 MHz).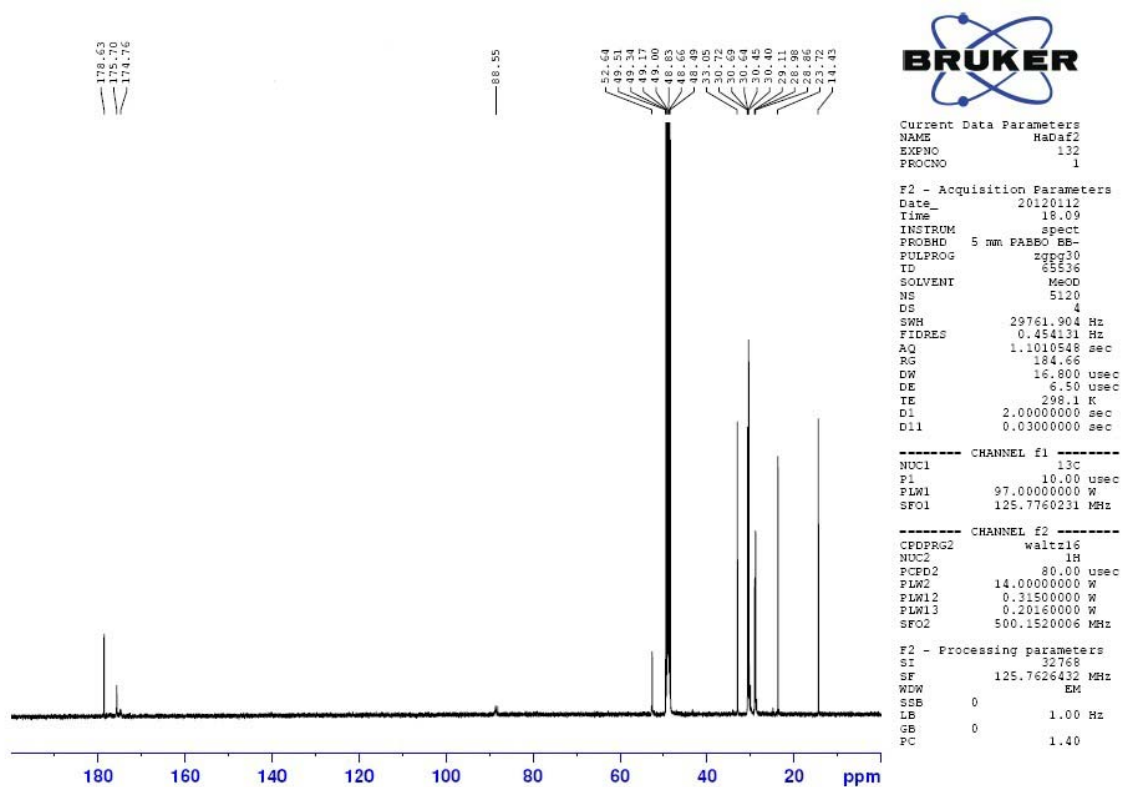

Figure S11. The DEPT135 NMR spectrum of compound 3 (methanol-*d*<sub>4</sub>, 125 MHz).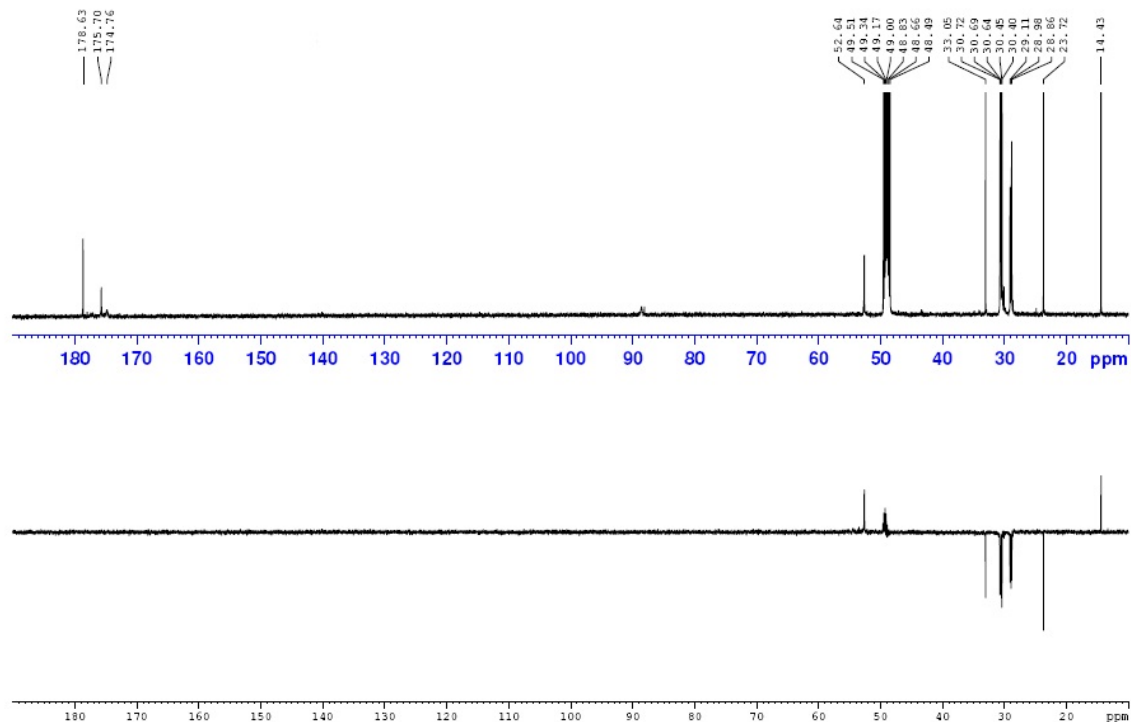

Figure S12. The HRESIMS spectrum of compound 3.

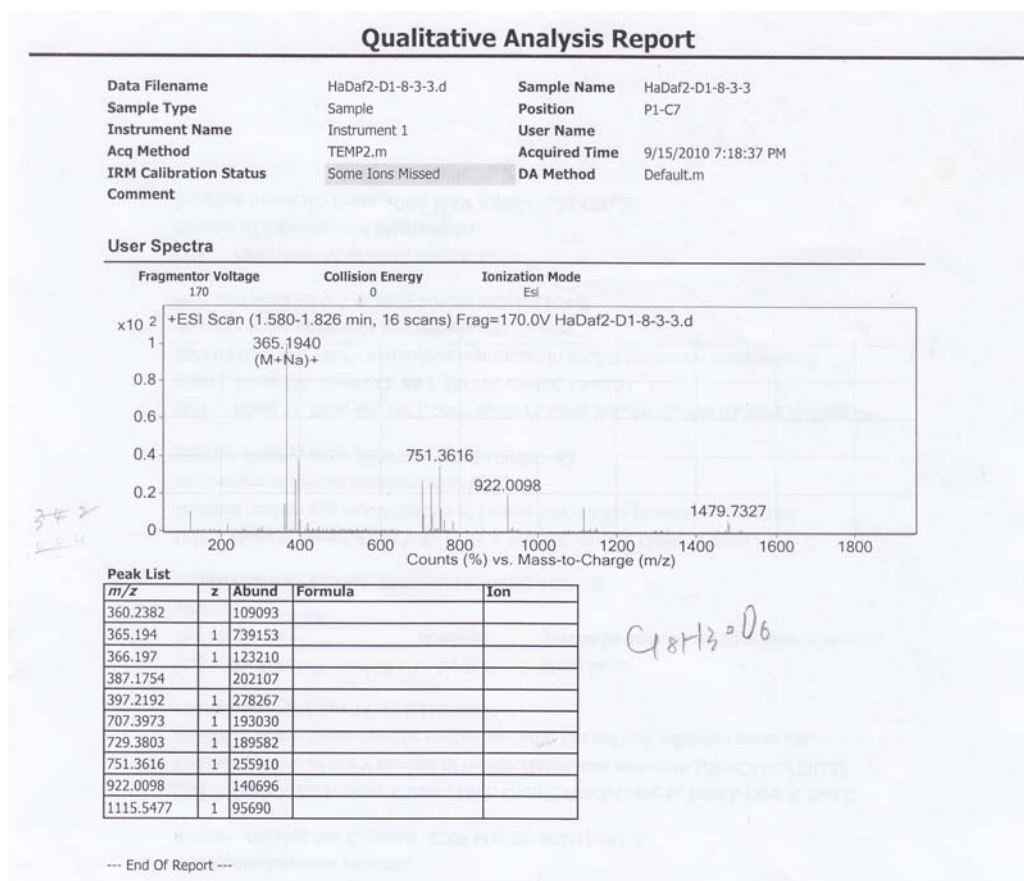

Supplement: s1 [file s1]
